# Supplementary material for: Historical Assembly of Andean Tree Communities
Source: MDPI journal article supplement (doi:10.3390/plants12203546), 2023-10-12
Supplement: s1 [file s1]

## Supplementary Materials

### *Methodological remarks*

We assessed two potential limitations in our methodology, one related to the simulations and one related to the empirical approach:

- 1- We used a single combination of the parameter of speciation and extinction in our simulation in the main text that can derive in different phylogenetic tree shapes that also influence phylogenetic diversity estimates. Here, we used multiple combinations of these parameters to assess the influence of different speciation and extinction parameters in our general results.
- 2- We used a broad taxonomic scale species pool in our empirical analyses, including angiosperms and gymnosperms. Gymnosperms represent long branches in the phylogenetic tree and can affect phylogenetic diversity estimates. Also, gymnosperm species have a low abundance in many of our plots compared to angiosperms.

The phylogenetic diversity patterns can be influenced by the phylogenetic tree's shape, which ultimately depends on the speciation and extinction rates of clades [47,24]. We used different combinations of speciation (0.5, 0.75 and 1) and extinction rates (0.01, 0.05 and 0.1) in our computer simulation to vary the shape of the simulated phylogenetic tree and assess its influence in our conclusions. We did not find any signal of a significant effect of speciation and extinction rates on the patterns of phylogenetic diversity along latitude and elevation neither by the TNC nor by the MZO hypothesis (Fig. S1). Then, our results are consistent with the overall idea that historical dispersal between contrasting biomes had a higher relative importance than speciation or extinction rates on determining the observed patterns of phylogenetic diversity along latitudinal and elevational gradients [48]. Recent studies on plants and vertebrates have found similar results and showed that diversification rates (i.e., speciation minus extinction) are similar across latitude or can even increase poleward (but see [48–50]). These findings support our claims that an increment in the phylogenetic diversity along latitude and elevation could be robust even to variations in the diversification rates.

In South America, the gymnosperms (e.g., Araucariaceae) were a dominant feature during the Maastrichtian, which may have left its fingerprint on the composition of the subsequent neotropical forest formation after the massive Cretaceous extinction event [20]. A high abundance of gymnosperms could distort or enhance the length of the branches in the phylogenetic tree, and thus, the assessment of the phylogenetic diversity along the latitudinal gradient. Thus, to assess the robustness and validity of our results, we reduced our taxonomic scope to only angiosperms and found that the results remained very much the same than those employing gymnosperms + angiosperms (Fig. S2). These results show that the effect of gymnosperms was not the cause of the pattern of increase of the phylogenetic diversity along with latitude or elevation. (Fig. S2). Then, we confirm that our claims about the MZO hypothesis as an underlying mechanism of the tree community assembly are not an artifact or a particular case on determining the latitudinal and elevational gradient in Andean forests.

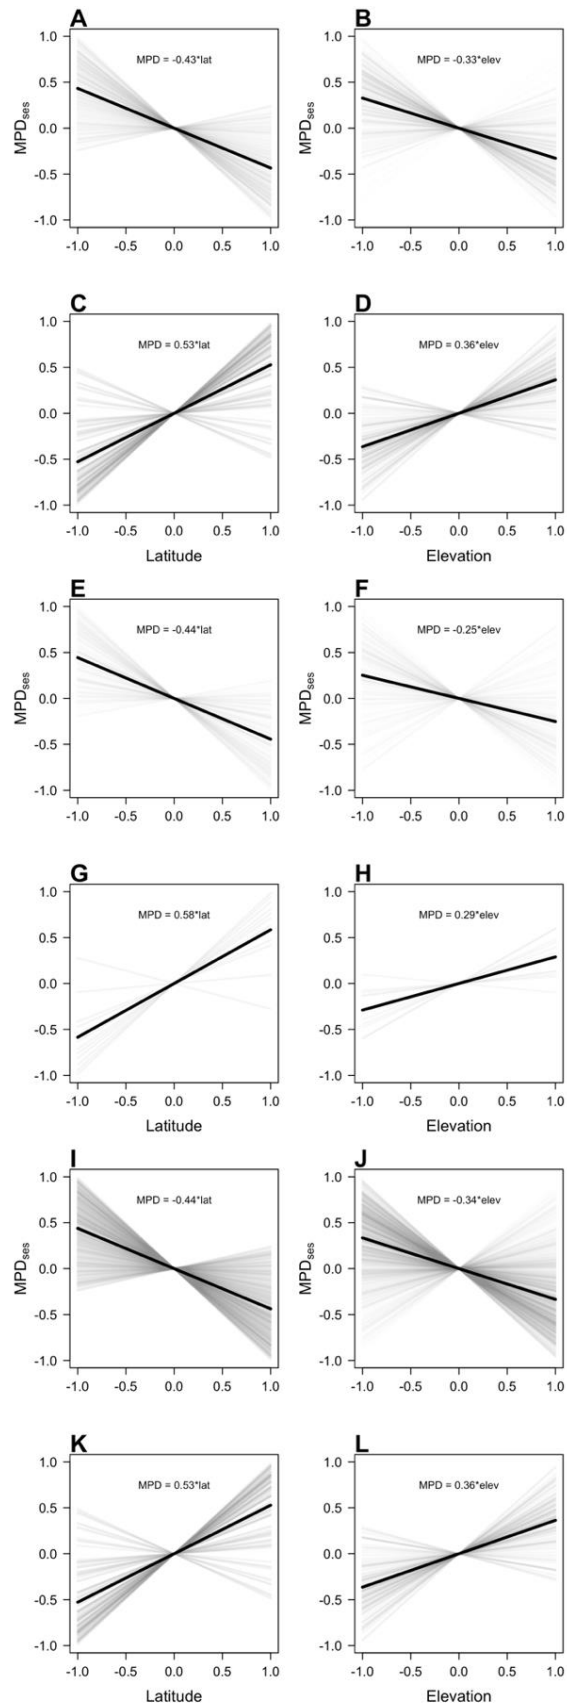

**Figure S1.** Variation of simulated standardized effect size of mean pairwise phylogenetic distance (MPDs<sub>es</sub>) across latitude and elevation obtained from simulations of the Tropical Niche Conservatism hypothesis (left panels) and the Multiple Zone of Origin hypothesis (right panels). The black lines showed the main effect of the x-axis variable and gray lines represent simulations between 0.25 and 0.75 quantiles. The equation is based on the average of regression coefficients of 1000 simulations. Simulations using speciation rate = 0.5 and extinction = 0.1 (A, B, C, D), simulations using speciation rate = 0.75 and extinction = 0.05 (E, F, G, H) and simulations using speciation rate = 0.5 and extinction = 0.05 (I, J, K, L).

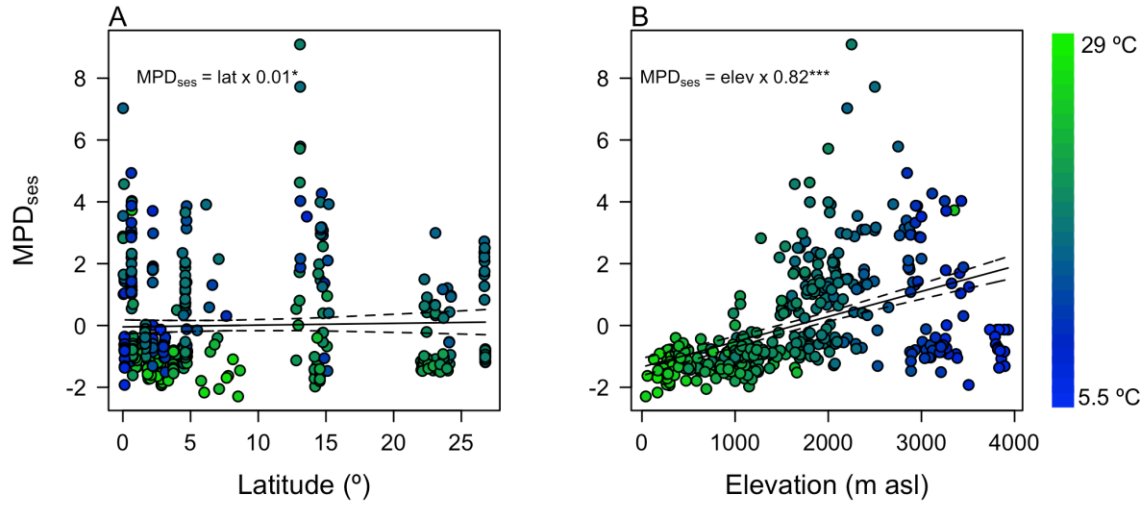

**Figure S2.** The standardized mean pairwise phylogenetic distance among co-occurring species in each plot ( $MPD_{ses}$ ) after control by the effect of plot area (i.e., residuals of a regression between  $MPD_{ses}$  and plot area) along latitude (A) and elevation (B) including angiosperms alone. The black lines showed the main effect of the variable and the gray lines indicates their confidence intervals. Color indicates mean annual temperature in each plot. Asterisks indicate slope significance.

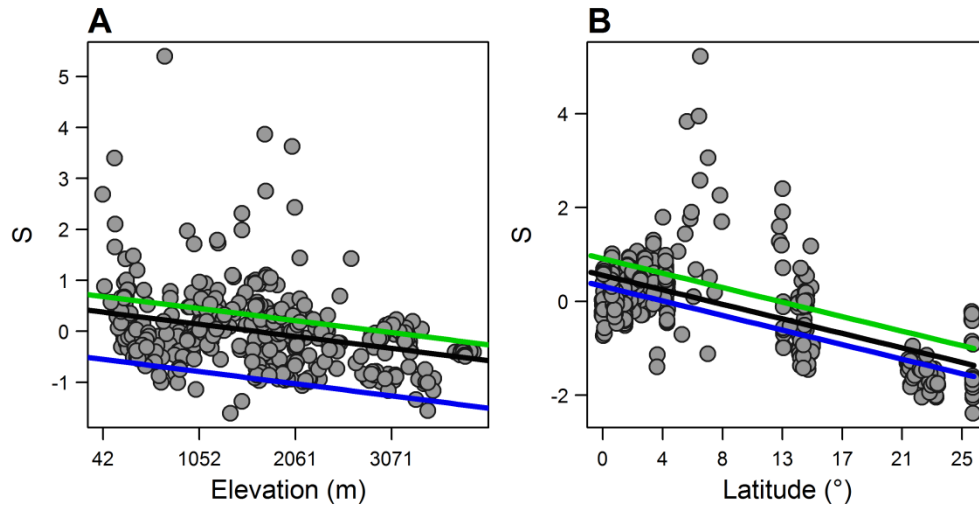

**Figure S3.** Component plus residuals plots for the species richness in each plot (S) along elevation (A) and latitude (B). The black lines showed the main effect of the variable, and the green and blue lines represent their effect to different values of the other variable.

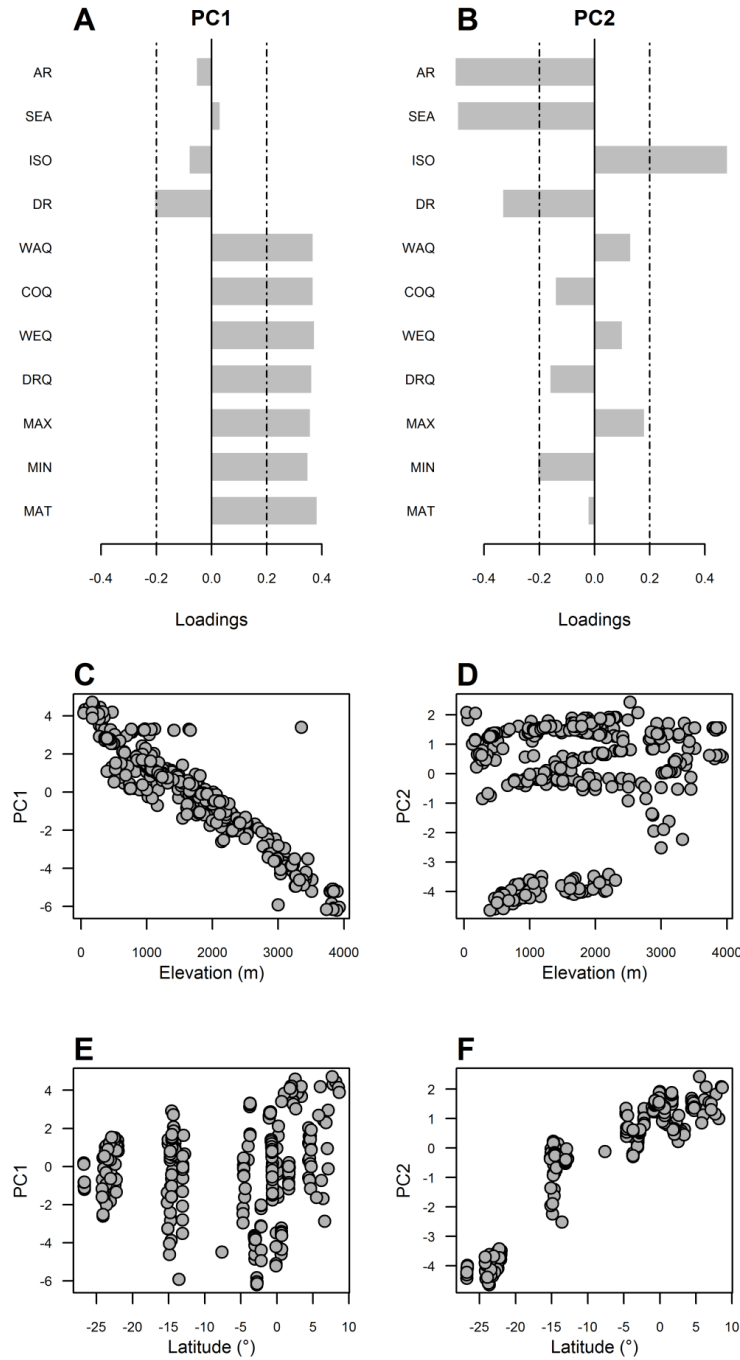

**Figure S4.** Loadings for the PC1 (A) and PC2 (B) of the principal component analysis of the eleven bioclimatic variables related to temperature used in the Figure 1. The variation of PC1 along elevation (C) and latitudinal (E) gradients. The variation of PC2 along elevation (D) and latitudinal (F) gradients.

**Tabla S1.** Metadata used in this analyses.

| Elev (m) | Long<br>(°) | Lat<br>(°) | Area(m <sup>2</sup> ) | SR    | MPD_OB<br>S | MPD_Rmea<br>n | MPD_Rs<br>d | ses.MP<br>D |
|----------|-------------|------------|-----------------------|-------|-------------|---------------|-------------|-------------|
| 304      | -72,72      | 1,90       | 2500,00               | 53,00 | 235,56      | 253,54        | 15,27       | -1,18       |
| 330      | -72,95      | 2,09       | 2500,00               | 44,00 | 233,55      | 251,92        | 16,10       | -1,14       |
| 338      | -72,92      | 2,09       | 2500,00               | 47,00 | 233,16      | 252,52        | 15,44       | -1,25       |
| 272      | -72,59      | 2,02       | 2500,00               | 56,00 | 229,86      | 252,38        | 14,71       | -1,53       |
| 276      | -72,58      | 1,03       | 2500,00               | 62,00 | 236,15      | 252,74        | 13,58       | -1,22       |
| 329      | -72,58      | 2,01       | 2500,00               | 53,00 | 235,56      | 253,26        | 14,78       | -1,20       |
| 267      | -72,72      | 1,84       | 2500,00               | 66,00 | 234,51      | 252,35        | 13,15       | -1,36       |
| 232      | -72,71      | 1,82       | 2500,00               | 55,00 | 234,48      | 252,93        | 14,85       | -1,24       |
| 265      | -72,71      | 1,83       | 2500,00               | 65,00 | 233,42      | 252,86        | 13,81       | -1,41       |
| 250      | -72,72      | 1,84       | 2500,00               | 61,00 | 232,08      | 252,49        | 13,78       | -1,48       |
| 312      | -72,67      | 1,97       | 2500,00               | 72,00 | 234,26      | 252,32        | 12,61       | -1,43       |
| 299      | -72,72      | 1,89       | 2500,00               | 51,00 | 228,46      | 252,85        | 15,37       | -1,59       |
| 288      | -73,37      | 2,86       | 2500,00               | 65,00 | 230,06      | 252,43        | 13,18       | -1,70       |
| 248      | -73,39      | 2,88       | 2500,00               | 48,00 | 230,68      | 252,09        | 15,63       | -1,37       |
| 296      | -73,40      | 2,89       | 2500,00               | 68,00 | 240,57      | 252,84        | 13,23       | -0,93       |
| 296      | -73,38      | 2,85       | 2500,00               | 49,00 | 224,77      | 252,45        | 15,64       | -1,77       |
| 278      | -73,34      | 2,85       | 2500,00               | 63,00 | 229,54      | 251,75        | 13,12       | -1,69       |
| 266      | -73,36      | 2,84       | 2500,00               | 74,00 | 230,37      | 252,80        | 12,43       | -1,81       |
| 304      | -73,33      | 2,81       | 2500,00               | 50,00 | 235,03      | 252,80        | 16,09       | -1,10       |
| 261      | -73,60      | 3,39       | 2500,00               | 29,00 | 239,09      | 252,50        | 21,18       | -0,63       |
| 235      | -73,38      | 2,92       | 2500,00               | 25,00 | 222,62      | 252,44        | 21,04       | -1,42       |
| 266      | -73,36      | 2,92       | 2500,00               | 35,00 | 236,36      | 252,23        | 17,84       | -0,89       |
| 285      | -72,69      | 1,89       | 2500,00               | 31,00 | 237,55      | 253,91        | 20,09       | -0,81       |
| 296      | -73,39      | 2,93       | 2500,00               | 39,00 | 222,82      | 252,04        | 17,89       | -1,63       |
| 296      | -73,40      | 2,93       | 2500,00               | 34,00 | 236,05      | 252,28        | 18,85       | -0,86       |
| 304      | -73,45      | 2,84       | 2500,00               | 24,00 | 238,81      | 252,56        | 22,99       | -0,60       |
| 241      | -73,42      | 2,82       | 2500,00               | 37,00 | 224,10      | 251,42        | 18,29       | -1,49       |
| 304      | -73,41      | 2,82       | 2500,00               | 47,00 | 235,87      | 253,01        | 15,96       | -1,07       |
| 279      | -74,10      | 2,19       | 2500,00               | 38,00 | 241,43      | 252,45        | 18,69       | -0,59       |
| 318      | -74,08      | 2,20       | 2500,00               | 36,00 | 227,78      | 251,49        | 17,82       | -1,33       |
| 314      | -74,09      | 2,21       | 2500,00               | 51,00 | 235,72      | 252,84        | 15,78       | -1,08       |
| 359      | -74,44      | 2,28       | 2500,00               | 34,00 | 236,42      | 252,42        | 18,57       | -0,86       |
| 449      | -74,43      | 2,28       | 2500,00               | 26,00 | 234,52      | 253,55        | 22,61       | -0,84       |
| 273      | -72,70      | 1,89       | 2500,00               | 34,00 | 234,23      | 252,11        | 19,14       | -0,93       |
| 510      | -74,51      | 2,61       | 2500,00               | 58,00 | 237,72      | 252,54        | 14,16       | -1,05       |
| 1037     | -74,51      | 2,61       | 2500,00               | 33,00 | 240,73      | 252,74        | 19,45       | -0,62       |
| 312      | -72,67      | 1,97       | 2500,00               | 35,00 | 237,22      | 252,89        | 18,75       | -0,84       |
| 288      | -72,78      | 2,54       | 2500,00               | 77,00 | 234,13      | 252,42        | 12,51       | -1,46       |
| 190      | -72,58      | 2,52       | 2500,00               | 49,00 | 240,89      | 253,05        | 15,78       | -0,77       |



|      |        |       |         |       |        |        |       |       |
|------|--------|-------|---------|-------|--------|--------|-------|-------|
| 473  | -72,94 | 3,35  | 2500,00 | 67,00 | 230,87 | 252,63 | 13,53 | -1,61 |
| 302  | -72,84 | 1,98  | 2500,00 | 71,00 | 239,55 | 252,62 | 13,11 | -1,00 |
| 234  | -72,83 | 1,97  | 2500,00 | 65,00 | 233,69 | 252,34 | 13,50 | -1,38 |
| 203  | -72,82 | 1,97  | 2500,00 | 42,00 | 231,82 | 252,95 | 17,17 | -1,23 |
| 234  | -72,83 | 1,96  | 2500,00 | 46,00 | 231,36 | 252,56 | 15,95 | -1,33 |
| 349  | -72,92 | 2,07  | 2500,00 | 36,00 | 226,08 | 252,29 | 17,85 | -1,47 |
| 772  | -80,63 | -3,77 | 2500,00 | 38,00 | 232,47 | 252,71 | 18,48 | -1,10 |
|      |        | -     | 10000,0 |       |        |        |       |       |
| 654  | -64,57 | 24,13 | 0       | 32,00 | 233,03 | 252,15 | 19,11 | -1,00 |
|      |        | -     | 10000,0 |       |        |        |       |       |
| 1181 | -63,90 | 22,02 | 0       | 41,00 | 236,81 | 252,84 | 16,81 | -0,95 |
|      |        | -     | 10000,0 |       |        |        |       |       |
| 1014 | -63,92 | 22,04 | 0       | 44,00 | 232,71 | 251,88 | 15,78 | -1,21 |
|      |        | -     | 10000,0 |       |        |        |       |       |
| 465  | -64,47 | 23,12 | 0       | 51,00 | 234,79 | 252,49 | 15,53 | -1,14 |
| 439  | -77,49 | -1,07 | 3600,00 | 31,00 | 242,91 | 251,94 | 19,01 | -0,48 |
| 473  | -77,50 | -1,07 | 3600,00 | 42,00 | 243,02 | 252,47 | 16,12 | -0,59 |
| 407  | -77,50 | -1,06 | 3600,00 | 37,00 | 241,56 | 251,64 | 17,46 | -0,58 |
|      |        | -     | 10000,0 |       |        |        |       |       |
| 735  | -64,94 | 24,01 | 0       | 39,00 | 231,08 | 252,32 | 17,54 | -1,21 |
|      |        |       | 10000,0 | 233,0 |        |        |       |       |
| 2027 | -75,70 | 6,15  | 0       | 0     | 281,81 | 252,79 | 6,91  | 4,20  |
|      |        |       | 10000,0 | 240,0 |        |        |       |       |
| 1740 | -75,14 | 6,99  | 0       | 0     | 251,51 | 253,03 | 7,05  | -0,22 |
|      |        | -     | 10000,0 |       |        |        |       |       |
| 1984 | -64,85 | 23,06 | 0       | 19,00 | 275,66 | 253,12 | 25,89 | 0,87  |
| 749  | -80,64 | -3,78 | 2500,00 | 65,00 | 234,90 | 252,44 | 13,99 | -1,25 |
|      |        | -     | 10000,0 |       |        |        |       |       |
| 1684 | -64,74 | 22,46 | 0       | 33,00 | 265,31 | 252,99 | 19,56 | 0,63  |
|      |        | -     | 10000,0 |       |        |        |       |       |
| 1973 | -64,74 | 22,46 | 0       | 22,00 | 279,71 | 253,26 | 23,74 | 1,11  |
|      |        |       | 10000,0 |       |        |        |       |       |
| 2928 | -75,65 | 6,61  | 0       | 80,00 | 271,58 | 252,60 | 12,28 | 1,55  |
|      |        | -     | 10000,0 |       |        |        |       |       |
| 2134 | -64,85 | 23,09 | 0       | 4,00  | 437,46 | 253,29 | 57,17 | 3,22  |
|      |        | -     | 10000,0 |       |        |        |       |       |
| 829  | -63,90 | 22,13 | 0       | 43,00 | 232,69 | 251,80 | 16,49 | -1,16 |
|      |        | -     | 10000,0 |       |        |        |       |       |
| 778  | -63,90 | 22,10 | 0       | 38,00 | 233,93 | 251,94 | 17,69 | -1,02 |
|      |        | -     |         |       |        |        |       |       |
| 1696 | -65,36 | 26,72 | 2400,00 | 6,00  | 375,62 | 253,06 | 45,74 | 2,68  |
|      |        | -     |         |       |        |        |       |       |
| 1752 | -65,34 | 26,70 | 4800,00 | 9,00  | 320,55 | 252,07 | 36,30 | 1,89  |

|      |        |       |         |       |        |        |       |       |  |
|------|--------|-------|---------|-------|--------|--------|-------|-------|--|
|      |        | -     |         |       |        |        |       |       |  |
| 1607 | -65,34 | 26,71 | 3200,00 | 14,00 | 282,29 | 253,37 | 30,42 | 0,95  |  |
|      |        | -     |         |       |        |        |       |       |  |
| 1644 | -65,35 | 26,72 | 2400,00 | 9,00  | 323,77 | 252,86 | 36,55 | 1,94  |  |
|      |        | -     |         |       |        |        |       |       |  |
| 1643 | -65,35 | 26,71 | 2400,00 | 7,00  | 347,50 | 251,88 | 41,43 | 2,31  |  |
|      |        | -     |         |       |        |        |       |       |  |
| 1871 | -65,34 | 26,70 | 2400,00 | 5,00  | 380,66 | 252,04 | 49,93 | 2,58  |  |
|      |        | -     |         |       |        |        |       |       |  |
| 1755 | -65,34 | 26,70 | 1600,00 | 6,00  | 384,85 | 252,25 | 44,27 | 3,00  |  |
|      |        | -     |         |       |        |        |       |       |  |
| 1792 | -65,34 | 26,70 | 2400,00 | 6,00  | 362,04 | 251,81 | 44,12 | 2,50  |  |
|      |        | -     |         |       |        |        |       |       |  |
| 1672 | -65,36 | 26,73 | 2400,00 | 6,00  | 375,62 | 252,70 | 45,79 | 2,68  |  |
|      |        | -     |         |       |        |        |       |       |  |
| 1757 | -65,33 | 26,70 | 2400,00 | 11,00 | 300,75 | 251,42 | 32,55 | 1,52  |  |
| 941  | -80,67 | -3,75 | 2500,00 | 53,00 | 242,97 | 253,08 | 15,58 | -0,65 |  |
|      |        |       | 10000,0 | 147,0 |        |        |       |       |  |
| 2646 | -76,03 | 6,38  | 0       | 0     | 260,03 | 252,91 | 8,73  | 0,82  |  |
|      |        | -     | 10000,0 | 151,0 |        |        |       |       |  |
| 1500 | -71,78 | 12,81 | 0       | 0     | 259,46 | 252,37 | 8,56  | 0,83  |  |
|      |        | -     | 10000,0 | 141,0 |        |        |       |       |  |
| 1250 | -71,78 | 12,80 | 0       | 0     | 244,50 | 252,17 | 9,23  | -0,83 |  |
|      |        |       | 10000,0 | 122,0 |        |        |       |       |  |
| 59   | -76,76 | 7,78  | 0       | 0     | 238,92 | 252,60 | 10,04 | -1,36 |  |
|      |        |       | 10000,0 | 109,0 |        |        |       |       |  |
| 128  | -74,94 | 8,13  | 0       | 0     | 243,70 | 252,81 | 10,17 | -0,90 |  |
|      |        | -     | 10000,0 |       |        |        |       |       |  |
| 1136 | -64,75 | 23,09 | 0       | 40,00 | 237,86 | 252,29 | 17,22 | -0,84 |  |
|      |        | -     | 10000,0 |       |        |        |       |       |  |
| 572  | -64,45 | 22,63 | 0       | 36,00 | 234,10 | 251,89 | 17,54 | -1,01 |  |
|      |        | -     | 12800,0 |       |        |        |       |       |  |
| 805  | -65,33 | 26,77 | 0       | 27,00 | 232,97 | 253,87 | 22,12 | -0,94 |  |
|      |        |       | 10000,0 |       |        |        |       |       |  |
| 3450 | -77,48 | -7,64 | 0       | 28,00 | 264,00 | 251,39 | 19,33 | 0,65  |  |
|      |        | -     | 10000,0 |       |        |        |       |       |  |
| 619  | -64,14 | 22,92 | 0       | 42,00 | 231,94 | 252,78 | 17,27 | -1,21 |  |
|      |        |       | 10000,0 |       |        |        |       |       |  |
| 1500 | -79,97 | -3,99 | 0       | 45,00 | 264,70 | 252,73 | 16,68 | 0,72  |  |
|      |        | -     | 10000,0 |       |        |        |       |       |  |
| 2140 | -65,49 | 24,11 | 0       | 4,00  | 235,75 | 254,94 | 63,71 | -0,30 |  |
| 1119 | -80,67 | -3,72 | 2500,00 | 71,00 | 236,82 | 252,67 | 13,26 | -1,19 |  |
| 972  | -80,66 | -3,74 | 2500,00 | 54,00 | 241,35 | 252,29 | 14,66 | -0,75 |  |

|        |        |       |         |       |        |        |       |       |
|--------|--------|-------|---------|-------|--------|--------|-------|-------|
| 3511   | -77,70 | 0,59  | 3600,00 | 17,00 | 290,89 | 254,23 | 28,24 | 1,30  |
| 3410   | -77,70 | 0,59  | 3600,00 | 13,00 | 310,27 | 252,76 | 31,04 | 1,85  |
| 3037   | -77,84 | 0,36  | 3600,00 | 21,00 | 231,33 | 252,10 | 23,42 | -0,89 |
| 3352   | -79,49 | 0,66  | 3600,00 | 16,00 | 360,82 | 254,76 | 29,62 | 3,58  |
| 3428   | -77,64 | 0,66  | 3600,00 | 14,00 | 377,44 | 251,84 | 28,02 | 4,48  |
| 2313   | -78,69 | -0,02 | 3600,00 | 18,00 | 349,78 | 253,07 | 26,82 | 3,61  |
| 2282   | -78,69 | -0,01 | 3600,00 | 28,00 | 316,39 | 252,67 | 21,24 | 3,00  |
| 2203   | -78,69 | -0,01 | 3600,00 | 16,00 | 452,43 | 253,77 | 27,74 | 7,16  |
| 2492   | -78,57 | 0,12  | 3600,00 | 26,00 | 287,34 | 252,61 | 21,88 | 1,59  |
| 2212   | -78,57 | 0,11  | 3600,00 | 18,00 | 296,67 | 250,83 | 24,37 | 1,88  |
| 1879   | -78,72 | 0,05  | 3600,00 | 18,00 | 300,19 | 253,41 | 26,00 | 1,80  |
| 1829   | -78,72 | 0,05  | 3600,00 | 28,00 | 277,40 | 252,20 | 20,01 | 1,26  |
| 827    | -78,88 | 0,16  | 3600,00 | 15,00 | 243,35 | 252,09 | 27,47 | -0,32 |
| 1018   | -78,53 | 0,10  | 3600,00 | 10,00 | 244,76 | 249,76 | 30,29 | -0,17 |
| 653    | -78,91 | 0,19  | 3600,00 | 15,00 | 236,79 | 251,46 | 27,86 | -0,53 |
| 632    | -78,91 | 0,19  | 3600,00 | 20,00 | 246,07 | 252,15 | 24,68 | -0,25 |
| 1277   | -78,81 | -0,03 | 3600,00 | 33,00 | 310,17 | 252,36 | 19,00 | 3,04  |
| 1640,3 | -78,74 | -0,08 | 3600,00 | 48,00 | 328,01 | 253,42 | 15,73 | 4,74  |
| 3421,4 | -78,60 | -0,12 | 3600,00 | 25,00 | 279,46 | 253,13 | 22,11 | 1,19  |
| 2932   | -78,60 | -0,10 | 3600,00 | 18,00 | 236,30 | 254,27 | 27,25 | -0,66 |
| 3109   | -78,60 | -0,10 | 3600,00 | 21,00 | 241,87 | 255,19 | 25,96 | -0,51 |
| 3507   | -78,59 | -0,13 | 3600,00 | 9,00  | 187,33 | 251,04 | 36,16 | -1,76 |
|        |        |       | 10000,0 | 220,0 |        |        |       |       |
| 166    | -74,82 | 7,66  | 0       | 0     | 242,10 | 252,61 | 7,20  | -1,46 |
|        |        | -     | 10000,0 |       |        |        |       |       |
| 1548   | -65,10 | 24,12 | 0       | 28,00 | 266,65 | 253,29 | 21,81 | 0,61  |
| 1065   | -80,68 | -3,72 | 2500,00 | 50,00 | 237,58 | 252,50 | 15,57 | -0,96 |
|        |        | -     | 10000,0 |       |        |        |       |       |
| 1084   | -65,06 | 23,99 | 0       | 37,00 | 237,19 | 252,14 | 17,48 | -0,85 |
| 1412   | -80,69 | -3,72 | 2500,00 | 76,00 | 239,86 | 252,24 | 12,37 | -1,00 |
|        |        | -     |         |       |        |        |       |       |
| 741    | -65,32 | 26,77 | 9600,00 | 28,00 | 239,81 | 252,67 | 21,20 | -0,61 |
| 1414   | -80,70 | -3,71 | 2500,00 | 48,00 | 235,23 | 251,91 | 15,39 | -1,08 |
|        |        | -     | 10000,0 |       |        |        |       |       |
| 1159   | -65,14 | 24,19 | 0       | 30,00 | 238,26 | 252,33 | 19,77 | -0,71 |
| 1642   | -80,70 | -3,72 | 2500,00 | 71,00 | 236,99 | 253,34 | 14,11 | -1,16 |
| 1106   | -73,51 | 4,38  | 2500,00 | 44,00 | 233,92 | 252,58 | 16,57 | -1,13 |
| 1304   | -73,51 | 4,39  | 2500,00 | 36,00 | 238,44 | 253,25 | 18,96 | -0,78 |
| 1800   | -73,53 | 4,40  | 2500,00 | 19,00 | 238,84 | 253,39 | 25,53 | -0,57 |
| 2059   | -73,54 | 4,40  | 2500,00 | 20,00 | 224,64 | 252,61 | 24,81 | -1,13 |
| 1066   | -73,44 | 4,48  | 2500,00 | 36,00 | 237,61 | 252,67 | 18,99 | -0,79 |
| 1370   | -73,45 | 4,50  | 2500,00 | 36,00 | 230,16 | 251,97 | 17,28 | -1,26 |
| 1751   | -73,45 | 4,50  | 2500,00 | 29,00 | 240,77 | 252,01 | 19,72 | -0,57 |

|      |        |       |         |       |        |        |       |       |
|------|--------|-------|---------|-------|--------|--------|-------|-------|
| 2072 | -73,46 | 4,50  | 2500,00 | 43,00 | 234,67 | 252,14 | 16,51 | -1,06 |
| 1068 | -73,39 | 4,61  | 2500,00 | 40,00 | 236,92 | 252,56 | 17,84 | -0,88 |
| 1543 | -73,41 | 4,62  | 2500,00 | 37,00 | 238,64 | 252,89 | 17,85 | -0,80 |
| 1889 | -73,42 | 4,62  | 2500,00 | 23,00 | 230,76 | 254,15 | 24,79 | -0,94 |
| 2275 | -73,45 | 4,66  | 2500,00 | 30,00 | 264,55 | 252,76 | 20,47 | 0,58  |
| 3372 | -79,17 | -3,06 | 500,00  | 20,00 | 233,24 | 252,03 | 24,52 | -0,77 |
| 3385 | -79,16 | -3,06 | 500,00  | 21,00 | 230,61 | 251,49 | 22,97 | -0,91 |
| 3290 | -79,16 | -3,07 | 500,00  | 27,00 | 235,97 | 252,85 | 20,79 | -0,81 |
| 3218 | -79,15 | -3,07 | 500,00  | 22,00 | 235,70 | 252,59 | 23,38 | -0,72 |
| 3011 | -79,11 | -3,08 | 500,00  | 24,00 | 243,90 | 252,43 | 21,99 | -0,39 |
| 3100 | -79,12 | -3,08 | 500,00  | 17,00 | 235,28 | 251,97 | 26,70 | -0,63 |
| 3050 | -79,11 | -3,08 | 500,00  | 25,00 | 238,25 | 254,01 | 22,99 | -0,69 |
| 1068 | -73,34 | 4,73  | 2500,00 | 41,00 | 234,37 | 252,40 | 17,38 | -1,04 |
| 1483 | -73,36 | 4,74  | 2500,00 | 18,00 | 235,73 | 251,88 | 25,06 | -0,64 |
| 1810 | -73,37 | 4,74  | 2500,00 | 37,00 | 237,47 | 254,23 | 19,05 | -0,88 |
| 2013 | -73,39 | 4,75  | 2500,00 | 28,00 | 238,16 | 253,28 | 21,76 | -0,69 |
| 1663 | -80,70 | -3,71 | 2500,00 | 57,00 | 232,85 | 252,43 | 14,72 | -1,33 |
|      |        |       | 10000,0 | 121,0 |        |        |       |       |
| 2527 | -75,90 | 5,49  | 0       | 0     | 253,44 | 252,41 | 9,65  | 0,11  |
| 1848 | -80,72 | -3,69 | 2500,00 | 50,00 | 237,99 | 252,78 | 15,53 | -0,95 |
|      |        | -     | 10000,0 |       |        |        |       |       |
| 845  | -63,84 | 22,27 | 0       | 47,00 | 235,71 | 252,53 | 16,45 | -1,02 |
|      |        | -     | 10000,0 |       |        |        |       |       |
| 827  | -63,88 | 22,22 | 0       | 44,00 | 235,58 | 252,70 | 16,14 | -1,06 |
|      |        | -     | 10000,0 |       |        |        |       |       |
| 990  | -63,95 | 22,13 | 0       | 46,00 | 232,62 | 253,47 | 16,60 | -1,26 |
| 1903 | -80,72 | -3,68 | 2500,00 | 47,00 | 282,13 | 252,65 | 15,73 | 1,87  |
|      |        | -     | 11200,0 |       |        |        |       |       |
| 910  | -65,33 | 26,76 | 0       | 25,00 | 238,91 | 251,77 | 22,06 | -0,58 |
|      |        | -     | 10800,0 |       |        |        |       |       |
| 886  | -65,33 | 26,76 | 0       | 24,00 | 235,30 | 252,26 | 21,84 | -0,78 |
|      |        | -     | 10000,0 |       |        |        |       |       |
| 1486 | -64,80 | 23,08 | 0       | 34,00 | 263,31 | 252,64 | 19,08 | 0,56  |
|      |        | -     | 10000,0 |       |        |        |       |       |
| 1175 | -64,73 | 22,44 | 0       | 55,00 | 253,04 | 252,26 | 14,67 | 0,05  |
|      |        |       | 10000,0 |       |        |        |       |       |
| 1380 | -80,14 | -3,98 | 0       | 36,00 | 239,95 | 253,81 | 18,77 | -0,74 |
|      |        | -     | 10000,0 |       |        |        |       |       |
| 473  | -64,46 | 23,77 | 0       | 34,00 | 232,95 | 252,52 | 18,73 | -1,04 |
| 2111 | -80,72 | -3,68 | 2500,00 | 45,00 | 237,38 | 253,54 | 16,40 | -0,99 |
|      |        | -     | 10000,0 |       |        |        |       |       |
| 982  | -64,74 | 23,09 | 0       | 42,00 | 263,37 | 252,22 | 16,82 | 0,66  |

|         |        |       |         |       |        |        |       |       |
|---------|--------|-------|---------|-------|--------|--------|-------|-------|
|         |        |       | 10000,0 | 168,0 |        |        |       |       |
| 928     | -74,79 | 6,46  | 0       | 0     | 247,54 | 252,97 | 8,42  | -0,65 |
|         |        | -     | 10000,0 |       |        |        |       |       |
| 1082    | -64,87 | 23,70 | 0       | 38,00 | 238,35 | 252,45 | 17,52 | -0,80 |
|         |        | -     | 10000,0 |       |        |        |       |       |
| 1747    | -64,90 | 23,68 | 0       | 27,00 | 262,82 | 252,93 | 21,56 | 0,46  |
|         |        | -     | 10000,0 |       |        |        |       |       |
| 740     | -65,32 | 26,77 | 0       | 25,00 | 240,95 | 253,42 | 22,91 | -0,54 |
|         |        | -     | 10000,0 |       |        |        |       |       |
| 996     | -63,94 | 22,21 | 0       | 39,00 | 237,80 | 251,84 | 17,88 | -0,79 |
| 2884    | -78,44 | -2,23 | 400,00  | 9,00  | 368,97 | 254,59 | 39,46 | 2,90  |
| 2530    | -78,36 | -2,19 | 400,00  | 12,00 | 215,01 | 251,46 | 31,19 | -1,17 |
| 3266    | -78,48 | -2,20 | 400,00  | 6,00  | 429,74 | 255,05 | 49,47 | 3,53  |
| 3261    | -78,48 | -2,20 | 400,00  | 13,00 | 312,08 | 252,81 | 30,85 | 1,92  |
| 3268    | -78,48 | -2,20 | 400,00  | 6,00  | 225,42 | 249,94 | 41,90 | -0,59 |
| 3257    | -78,48 | -2,20 | 400,00  | 10,00 | 242,43 | 252,77 | 34,55 | -0,30 |
| 3270    | -78,48 | -2,20 | 400,00  | 5,00  | 260,13 | 250,24 | 47,55 | 0,21  |
| 2873    | -78,44 | -2,23 | 400,00  | 15,00 | 308,62 | 251,12 | 27,44 | 2,10  |
| 2866    | -78,44 | -2,22 | 400,00  | 15,00 | 311,54 | 254,02 | 30,18 | 1,91  |
| 2859    | -78,46 | -2,20 | 400,00  | 18,00 | 305,31 | 253,19 | 26,79 | 1,95  |
| 2878    | -78,45 | -2,20 | 400,00  | 16,00 | 232,85 | 254,72 | 30,56 | -0,72 |
| 2296    | -78,36 | -2,20 | 400,00  | 22,00 | 241,91 | 252,69 | 22,94 | -0,47 |
| 2399    | -78,37 | -2,20 | 400,00  | 21,00 | 289,62 | 254,18 | 26,26 | 1,35  |
| 2361    | -78,37 | -2,20 | 400,00  | 23,00 | 239,21 | 252,47 | 22,72 | -0,58 |
| 2385    | -78,37 | -2,20 | 400,00  | 23,00 | 297,67 | 254,04 | 22,99 | 1,90  |
| 983     | -77,59 | -0,82 | 3600,00 | 36,00 | 242,53 | 252,82 | 18,41 | -0,56 |
| 975     | -77,59 | -0,81 | 3600,00 | 52,00 | 238,05 | 252,96 | 15,49 | -0,96 |
| 1000    | -77,58 | -0,82 | 3600,00 | 49,00 | 241,21 | 252,32 | 15,25 | -0,73 |
| 2083    | -80,73 | -3,68 | 2500,00 | 40,00 | 261,86 | 253,11 | 17,34 | 0,50  |
| 2092    | -77,84 | -0,63 | 400,00  | 22,00 | 288,48 | 252,63 | 23,28 | 1,54  |
| 1802,47 |        |       |         |       |        |        |       |       |
| 6       | -77,80 | -0,65 | 400,00  | 37,00 | 327,49 | 253,09 | 17,89 | 4,16  |
| 1475,79 | -77,78 | -0,64 | 400,00  | 14,00 | 322,16 | 251,37 | 28,54 | 2,48  |
| 1602,40 |        |       |         |       |        |        |       |       |
| 1       | -77,78 | -0,64 | 400,00  | 31,00 | 241,36 | 252,30 | 19,21 | -0,57 |
| 1721,35 |        |       |         |       |        |        |       |       |
| 2       | -77,79 | -0,65 | 400,00  | 31,00 | 314,42 | 253,12 | 20,34 | 3,01  |
| 1769,15 |        |       |         |       |        |        |       |       |
| 3       | -77,79 | -0,65 | 400,00  | 37,00 | 273,72 | 251,90 | 17,44 | 1,25  |
| 1777,56 |        |       |         |       |        |        |       |       |
| 4       | -77,79 | -0,65 | 400,00  | 34,00 | 276,93 | 252,88 | 18,58 | 1,29  |
| 2363,92 |        |       |         |       |        |        |       |       |
| 4       | -77,82 | -0,62 | 400,00  | 19,00 | 334,96 | 254,96 | 26,63 | 3,00  |

|         |        |       |         |       |        |        |       |       |  |
|---------|--------|-------|---------|-------|--------|--------|-------|-------|--|
| 2382,86 |        |       |         |       |        |        |       |       |  |
| 1       | -77,82 | -0,62 | 400,00  | 19,00 | 298,34 | 253,28 | 26,17 | 1,72  |  |
| 2300,34 |        |       |         |       |        |        |       |       |  |
| 3       | -77,82 | -0,62 | 400,00  | 20,00 | 237,43 | 253,32 | 26,06 | -0,61 |  |
| 2272,7  | -77,82 | -0,62 | 400,00  | 28,00 | 283,24 | 254,32 | 22,07 | 1,31  |  |
| 2161,96 |        |       |         |       |        |        |       |       |  |
| 6       | -77,84 | -0,63 | 400,00  | 20,00 | 292,95 | 252,25 | 24,47 | 1,66  |  |
| 2335,53 |        |       |         |       |        |        |       |       |  |
| 9       | -77,83 | -0,62 | 400,00  | 25,00 | 282,58 | 254,67 | 23,42 | 1,19  |  |
| 2415,96 |        |       |         |       |        |        |       |       |  |
| 3       | -77,83 | -0,62 | 400,00  | 18,00 | 290,97 | 252,86 | 25,55 | 1,49  |  |
| 2067,86 |        |       |         |       |        |        |       |       |  |
| 7       | -77,84 | -0,63 | 400,00  | 14,00 | 316,06 | 255,50 | 31,92 | 1,90  |  |
| 2078,95 |        |       |         |       |        |        |       |       |  |
| 9       | -77,84 | -0,64 | 400,00  | 19,00 | 300,61 | 252,75 | 25,15 | 1,90  |  |
| 2006,23 | -77,84 | -0,64 | 400,00  | 28,00 | 284,30 | 253,25 | 20,68 | 1,50  |  |
| 1880,66 |        |       |         |       |        |        |       |       |  |
| 6       | -77,80 | -0,65 | 400,00  | 23,00 | 284,96 | 252,43 | 22,70 | 1,43  |  |
| 1917,91 |        |       |         |       |        |        |       |       |  |
| 6       | -77,80 | -0,65 | 400,00  | 32,00 | 300,70 | 253,10 | 19,03 | 2,50  |  |
| 1910,96 |        |       |         |       |        |        |       |       |  |
| 5       | -77,80 | -0,65 | 400,00  | 24,00 | 281,36 | 252,76 | 21,72 | 1,32  |  |
| 1873,14 |        |       |         |       |        |        |       |       |  |
| 8       | -77,80 | -0,65 | 400,00  | 29,00 | 266,74 | 252,56 | 20,33 | 0,70  |  |
|         |        |       | 10000,0 | 190,0 |        |        |       |       |  |
| 41      | -76,66 | 8,51  | 0       | 0     | 236,55 | 252,55 | 7,76  | -2,06 |  |
|         |        | -     | 10000,0 |       |        |        |       |       |  |
| 1650    | -64,72 | 22,28 | 0       | 19,00 | 274,63 | 252,42 | 25,99 | 0,85  |  |
|         |        | -     | 10000,0 |       |        |        |       |       |  |
| 2200    | -64,75 | 22,27 | 0       | 12,00 | 308,24 | 252,33 | 33,40 | 1,67  |  |
|         |        | -     |         |       |        |        |       |       |  |
| 751     | -65,33 | 26,77 | 6000,00 | 26,00 | 231,52 | 252,17 | 20,65 | -1,00 |  |
| 2364    | -80,73 | -3,68 | 2500,00 | 29,00 | 273,34 | 252,82 | 20,70 | 0,99  |  |
|         |        | -     | 10000,0 |       |        |        |       |       |  |
| 1961    | -65,28 | 23,97 | 0       | 15,00 | 294,09 | 252,10 | 28,78 | 1,46  |  |
| 2314    | -80,73 | -3,68 | 2500,00 | 37,00 | 255,07 | 253,30 | 18,77 | 0,09  |  |
| 1937    | -76,07 | 1,67  | 2500,00 | 11,00 | 239,79 | 254,27 | 35,43 | -0,41 |  |
| 1949    | -76,07 | 1,68  | 2500,00 | 3,00  | 224,37 | 254,15 | 69,95 | -0,43 |  |
| 1859    | -76,07 | 1,69  | 2500,00 | 9,00  | 221,15 | 251,94 | 36,04 | -0,85 |  |
| 2018    | -76,06 | 1,68  | 2500,00 | 4,00  | 263,47 | 252,90 | 57,68 | 0,18  |  |
| 1810    | -76,06 | 1,66  | 2500,00 | 8,00  | 234,51 | 253,99 | 40,72 | -0,48 |  |
| 2035    | -76,06 | 1,68  | 2500,00 | 17,00 | 243,18 | 253,30 | 28,04 | -0,36 |  |
| 1793    | -76,08 | 1,67  | 2500,00 | 10,00 | 234,58 | 252,10 | 34,20 | -0,51 |  |

|      |        |       |         |       |        |        |       |       |
|------|--------|-------|---------|-------|--------|--------|-------|-------|
| 1980 | -76,06 | 1,67  | 2500,00 | 4,00  | 255,45 | 253,61 | 59,77 | 0,03  |
| 1721 | -76,07 | 1,66  | 2500,00 | 11,00 | 245,65 | 252,72 | 33,83 | -0,21 |
| 1682 | -76,08 | 1,66  | 2500,00 | 3,00  | 213,45 | 250,74 | 62,02 | -0,60 |
| 1639 | -76,09 | 1,65  | 2500,00 | 5,00  | 242,24 | 249,56 | 45,00 | -0,16 |
| 1676 | -76,10 | 1,64  | 2500,00 | 15,00 | 236,57 | 252,27 | 29,82 | -0,53 |
| 1896 | -76,09 | 1,64  | 2500,00 | 19,00 | 241,31 | 254,16 | 26,02 | -0,49 |
| 1941 | -76,09 | 1,64  | 2500,00 | 9,00  | 243,51 | 252,45 | 36,35 | -0,25 |
| 1793 | -76,09 | 1,63  | 2500,00 | 26,00 | 239,85 | 253,33 | 22,07 | -0,61 |
| 1962 | -76,09 | 1,63  | 2500,00 | 9,00  | 243,02 | 251,86 | 35,47 | -0,25 |
| 1701 | -76,02 | 1,64  | 2500,00 | 9,00  | 238,86 | 249,59 | 32,26 | -0,33 |
| 1929 | -76,07 | 1,67  | 2500,00 | 8,00  | 246,85 | 250,76 | 37,57 | -0,10 |
| 1658 | -76,03 | 1,65  | 2500,00 | 7,00  | 235,16 | 252,76 | 43,38 | -0,41 |
| 1788 | -76,03 | 1,64  | 2500,00 | 7,00  | 249,95 | 251,77 | 40,55 | -0,04 |
| 2204 | -76,28 | 1,63  | 2500,00 | 22,00 | 246,75 | 252,70 | 23,10 | -0,26 |
| 2077 | -76,28 | 1,63  | 2500,00 | 30,00 | 243,94 | 252,85 | 20,71 | -0,43 |
| 2072 | -76,27 | 1,64  | 2500,00 | 17,00 | 246,67 | 252,37 | 27,40 | -0,21 |
| 2909 | -79,46 | -4,71 | 3600,00 | 11,00 | 305,53 | 251,70 | 32,07 | 1,68  |
| 2955 | -79,46 | -4,71 | 3600,00 | 3,00  | 524,01 | 257,22 | 74,17 | 3,60  |
| 2817 | -79,46 | -4,70 | 3600,00 | 5,00  | 420,44 | 254,90 | 51,76 | 3,20  |
| 2840 | -79,46 | -4,70 | 3600,00 | 4,00  | 456,90 | 254,23 | 58,10 | 3,49  |
| 3049 | -79,46 | -4,71 | 3600,00 | 3,00  | 256,11 | 252,76 | 67,52 | 0,05  |
| 3096 | -79,46 | -4,71 | 3600,00 | 4,00  | 225,89 | 252,86 | 58,26 | -0,46 |
|      |        | -     | 10000,0 |       |        |        |       |       |
| 2304 | -64,93 | 23,63 | 0       | 15,00 | 292,95 | 252,74 | 28,29 | 1,42  |
| 3210 | -78,98 | -3,14 | 500,00  | 18,00 | 216,86 | 252,27 | 25,90 | -1,37 |
| 3100 | -78,98 | -3,14 | 500,00  | 21,00 | 231,04 | 254,57 | 24,97 | -0,94 |
| 3151 | -78,99 | -3,13 | 500,00  | 19,00 | 246,40 | 252,58 | 26,50 | -0,23 |
| 3120 | -78,99 | -3,12 | 500,00  | 28,00 | 238,69 | 252,49 | 20,78 | -0,66 |
| 3083 | -78,99 | -3,12 | 500,00  | 24,00 | 232,47 | 252,55 | 22,52 | -0,89 |
|      |        |       | 10000,0 | 120,0 |        |        |       |       |
| 977  | -75,08 | 6,78  | 0       | 0     | 248,88 | 252,65 | 10,14 | -0,37 |
|      |        | -     | 10000,0 |       |        |        |       |       |
| 835  | -68,66 | 14,20 | 0       | 55,00 | 234,24 | 252,60 | 14,82 | -1,24 |
|      |        | -     | 10000,0 |       |        |        |       |       |
| 935  | -68,65 | 14,20 | 0       | 56,00 | 234,15 | 252,72 | 14,50 | -1,28 |
|      |        | -     | 10000,0 |       |        |        |       |       |
| 1150 | -68,64 | 14,20 | 0       | 96,00 | 233,27 | 252,33 | 11,37 | -1,68 |
|      |        | -     | 10000,0 | 116,0 |        |        |       |       |
| 400  | -67,92 | 14,42 | 0       | 0     | 242,40 | 252,90 | 10,18 | -1,03 |
|      |        | -     | 10000,0 |       |        |        |       |       |
| 2872 | -69,02 | 14,68 | 0       | 38,00 | 313,74 | 252,70 | 17,65 | 3,46  |
|      |        | -     | 10000,0 |       |        |        |       |       |
| 3116 | -69,03 | 14,69 | 0       | 34,00 | 337,88 | 253,82 | 19,43 | 4,33  |

|      |        |       |         |       |        |        |       |       |  |
|------|--------|-------|---------|-------|--------|--------|-------|-------|--|
|      |        | -     | 10000,0 |       |        |        |       |       |  |
| 1232 | -68,73 | 14,76 | 0       | 68,00 | 252,65 | 252,63 | 13,27 | 0,00  |  |
|      |        | -     | 10000,0 |       |        |        |       |       |  |
| 850  | -68,59 | 14,25 | 0       | 55,00 | 233,68 | 252,69 | 14,93 | -1,27 |  |
|      |        | -     | 10000,0 |       |        |        |       |       |  |
| 1890 | -68,25 | 14,50 | 0       | 78,00 | 280,17 | 252,67 | 12,82 | 2,15  |  |
|      |        | -     | 10000,0 | 100,0 |        |        |       |       |  |
| 1247 | -68,71 | 14,67 | 0       | 0     | 238,85 | 252,52 | 11,12 | -1,23 |  |
|      |        | -     | 10000,0 |       |        |        |       |       |  |
| 2000 | -68,93 | 14,60 | 0       | 70,00 | 308,02 | 253,48 | 13,27 | 4,11  |  |
|      |        | -     | 10000,0 |       |        |        |       |       |  |
| 1900 | -68,93 | 14,60 | 0       | 85,00 | 272,89 | 252,46 | 11,66 | 1,75  |  |
|      |        | -     | 10000,0 | 124,0 |        |        |       |       |  |
| 280  | -67,65 | 14,61 | 0       | 0     | 239,67 | 252,48 | 9,84  | -1,30 |  |
|      |        | -     | 10000,0 |       |        |        |       |       |  |
| 795  | -68,52 | 14,25 | 0       | 52,00 | 230,18 | 251,64 | 14,49 | -1,48 |  |
|      |        | -     | 10000,0 |       |        |        |       |       |  |
| 933  | -68,53 | 14,25 | 0       | 65,00 | 234,34 | 252,76 | 13,89 | -1,33 |  |
|      |        | -     | 10000,0 |       |        |        |       |       |  |
| 2766 | -68,99 | 14,77 | 0       | 36,00 | 310,54 | 253,24 | 18,58 | 3,08  |  |
|      |        | -     | 10000,0 |       |        |        |       |       |  |
| 3324 | -68,86 | 14,89 | 0       | 16,00 | 297,02 | 254,24 | 28,64 | 1,49  |  |
|      |        | -     | 10000,0 |       |        |        |       |       |  |
| 1522 | -68,65 | 14,79 | 0       | 95,00 | 259,74 | 252,13 | 10,68 | 0,71  |  |
|      |        | -     | 10000,0 |       |        |        |       |       |  |
| 1538 | -68,64 | 14,77 | 0       | 98,00 | 283,50 | 252,66 | 10,59 | 2,91  |  |
|      |        | -     | 10000,0 | 137,0 |        |        |       |       |  |
| 1242 | -68,47 | 15,08 | 0       | 0     | 248,59 | 253,18 | 9,28  | -0,49 |  |
|      |        | -     | 10000,0 | 105,0 |        |        |       |       |  |
| 1054 | -68,46 | 15,09 | 0       | 0     | 265,31 | 252,29 | 10,03 | 1,30  |  |
|      |        | -     | 10000,0 |       |        |        |       |       |  |
| 1626 | -68,20 | 14,43 | 0       | 83,00 | 275,62 | 253,26 | 12,07 | 1,85  |  |
|      |        | -     | 10000,0 |       |        |        |       |       |  |
| 880  | -68,54 | 14,47 | 0       | 50,00 | 232,40 | 251,82 | 15,49 | -1,25 |  |
|      |        | -     | 10000,0 |       |        |        |       |       |  |
| 662  | -68,57 | 14,33 | 0       | 50,00 | 234,60 | 252,61 | 15,32 | -1,18 |  |
|      |        | -     | 10000,0 |       |        |        |       |       |  |
| 840  | -68,57 | 14,33 | 0       | 42,00 | 234,70 | 253,13 | 17,25 | -1,07 |  |
|      |        | -     | 10000,0 |       |        |        |       |       |  |
| 1020 | -68,57 | 14,33 | 0       | 61,00 | 233,19 | 252,99 | 14,86 | -1,33 |  |
|      |        | -     | 10000,0 |       |        |        |       |       |  |
| 1100 | -68,72 | 14,16 | 0       | 88,00 | 235,44 | 252,43 | 11,94 | -1,42 |  |



|      |        |       |         |       |        |        |       |       |
|------|--------|-------|---------|-------|--------|--------|-------|-------|
|      |        | -     | 10000,0 |       |        |        |       |       |
| 1250 | -68,75 | 14,15 | 0       | 90,00 | 239,01 | 252,86 | 11,68 | -1,19 |
|      |        | -     | 10000,0 |       |        |        |       |       |
| 1450 | -68,74 | 14,16 | 0       | 88,00 | 243,61 | 252,79 | 11,64 | -0,79 |
|      |        | -     | 10000,0 |       |        |        |       |       |
| 2498 | -68,97 | 14,78 | 0       | 40,00 | 310,33 | 253,39 | 17,54 | 3,25  |
|      |        | -     | 10000,0 |       |        |        |       |       |
| 1005 | -68,78 | 14,58 | 0       | 71,00 | 234,97 | 252,66 | 13,18 | -1,34 |
|      |        | -     | 10000,0 |       |        |        |       |       |
| 1223 | -68,78 | 14,57 | 0       | 94,00 | 238,65 | 252,64 | 10,86 | -1,29 |
|      |        | -     | 10000,0 |       |        |        |       |       |
| 1993 | -68,94 | 14,74 | 0       | 92,00 | 269,63 | 252,79 | 11,14 | 1,51  |
|      |        | -     | 10000,0 |       |        |        |       |       |
| 1804 | -68,95 | 14,75 | 0       | 82,00 | 252,55 | 253,37 | 11,82 | -0,07 |
|      |        | -     | 10000,0 |       |        |        |       |       |
| 2697 | -68,76 | 15,21 | 0       | 43,00 | 322,49 | 253,88 | 17,41 | 3,94  |
|      |        | -     | 10000,0 |       |        |        |       |       |
| 2369 | -68,76 | 15,20 | 0       | 44,00 | 263,19 | 253,80 | 17,45 | 0,54  |
|      |        | -     | 10000,0 |       |        |        |       |       |
| 2889 | -68,92 | 15,11 | 0       | 34,00 | 229,31 | 252,50 | 18,44 | -1,26 |
|      |        | -     | 10000,0 | 111,0 |        |        |       |       |
| 1400 | -68,59 | 14,78 | 0       | 0     | 249,52 | 252,86 | 10,46 | -0,32 |
|      |        | -     | 10000,0 |       |        |        |       |       |
| 1468 | -68,58 | 14,79 | 0       | 90,00 | 252,73 | 252,61 | 11,67 | 0,01  |
|      |        | -     | 10000,0 |       |        |        |       |       |
| 2859 | -68,88 | 15,13 | 0       | 35,00 | 296,26 | 253,15 | 18,96 | 2,27  |
|      |        | -     | 10000,0 |       |        |        |       |       |
| 2200 | -68,95 | 14,61 | 0       | 79,00 | 291,99 | 252,92 | 12,60 | 3,10  |
|      |        | -     | 10000,0 |       |        |        |       |       |
| 2400 | -68,95 | 14,62 | 0       | 81,00 | 293,28 | 253,61 | 11,92 | 3,33  |
|      |        | -     | 10000,0 |       |        |        |       |       |
| 2510 | -68,96 | 14,63 | 0       | 60,00 | 300,96 | 252,56 | 13,91 | 3,48  |
|      |        | -     | 10000,0 | 127,0 |        |        |       |       |
| 362  | -67,96 | 14,36 | 0       | 0     | 251,08 | 252,67 | 10,17 | -0,16 |
|      |        | -     | 10000,0 |       |        |        |       |       |
| 3035 | -68,85 | 14,89 | 0       | 23,00 | 233,69 | 251,65 | 22,87 | -0,79 |
|      |        | -     | 10000,0 |       |        |        |       |       |
| 1000 | -68,69 | 14,54 | 0       | 48,00 | 227,82 | 253,26 | 16,72 | -1,52 |
|      |        | -     | 10000,0 |       |        |        |       |       |
| 1180 | -68,69 | 14,55 | 0       | 56,00 | 230,59 | 253,17 | 15,20 | -1,49 |
|      |        | -     | 10000,0 |       |        |        |       |       |
| 850  | -68,69 | 14,55 | 0       | 40,00 | 232,22 | 251,81 | 17,00 | -1,15 |

|      |        |       |         |       |        |        |       |       |  |
|------|--------|-------|---------|-------|--------|--------|-------|-------|--|
|      |        |       | 10000,0 | 157,0 |        |        |       |       |  |
| 167  | -74,61 | 6,01  | 0       | 0     | 235,95 | 252,53 | 8,66  | -1,92 |  |
| 2647 | -80,74 | -3,68 | 2500,00 | 34,00 | 229,34 | 252,22 | 18,71 | -1,22 |  |
| 2802 | -80,75 | -3,67 | 2500,00 | 20,00 | 228,43 | 253,04 | 25,03 | -0,98 |  |
|      |        | -     | 10000,0 |       |        |        |       |       |  |
| 2166 | -65,48 | 24,10 | 0       | 5,00  | 236,89 | 251,31 | 48,43 | -0,30 |  |
|      |        | -     | 10000,0 |       |        |        |       |       |  |
| 596  | -63,97 | 22,45 | 0       | 34,00 | 237,15 | 253,52 | 19,91 | -0,82 |  |
|      |        | -     | 10000,0 |       |        |        |       |       |  |
| 711  | -63,93 | 22,55 | 0       | 45,00 | 235,91 | 252,72 | 16,78 | -1,00 |  |
| 960  | -80,65 | -3,75 | 2500,00 | 53,00 | 232,63 | 251,74 | 14,73 | -1,30 |  |
|      |        | -     | 10000,0 |       |        |        |       |       |  |
| 609  | -64,04 | 22,57 | 0       | 36,00 | 231,39 | 252,52 | 18,38 | -1,15 |  |
| 453  | -77,31 | -0,98 | 3600,00 | 47,00 | 236,38 | 252,46 | 15,20 | -1,06 |  |
| 395  | -77,31 | -0,98 | 3600,00 | 34,00 | 237,10 | 252,69 | 19,28 | -0,81 |  |
| 392  | -77,31 | -0,98 | 3600,00 | 53,00 | 234,99 | 253,19 | 15,56 | -1,17 |  |
| 360  | -77,24 | -0,90 | 3600,00 | 32,00 | 239,10 | 251,93 | 19,60 | -0,65 |  |
| 376  | -77,24 | -0,90 | 3600,00 | 39,00 | 242,62 | 253,09 | 18,31 | -0,57 |  |
| 381  | -77,24 | -0,90 | 3600,00 | 39,00 | 241,77 | 252,22 | 17,15 | -0,61 |  |
| 3232 | -78,86 | -2,99 | 500,00  | 13,00 | 237,41 | 252,54 | 30,18 | -0,50 |  |
| 3196 | -78,87 | -2,99 | 500,00  | 13,00 | 230,17 | 252,54 | 31,48 | -0,71 |  |
| 3210 | -78,87 | -3,00 | 500,00  | 12,00 | 234,97 | 252,75 | 32,25 | -0,55 |  |
|      |        |       | 10000,0 | 167,0 |        |        |       |       |  |
| 171  | -77,36 | 8,65  | 0       | 0     | 242,46 | 252,58 | 8,54  | -1,19 |  |
|      |        | -     | 10000,0 |       |        |        |       |       |  |
| 396  | -64,54 | 23,65 | 0       | 24,00 | 237,10 | 251,94 | 22,19 | -0,67 |  |
|      |        |       | 10000,0 | 299,0 |        |        |       |       |  |
| 691  | -74,73 | 7,11  | 0       | 0     | 241,49 | 252,62 | 6,26  | -1,78 |  |
|      |        | -     | 10000,0 |       |        |        |       |       |  |
| 1051 | -64,56 | 22,25 | 0       | 44,00 | 240,20 | 253,74 | 17,21 | -0,79 |  |
|      |        | -     | 10000,0 |       |        |        |       |       |  |
| 595  | -64,80 | 23,77 | 0       | 28,00 | 228,90 | 251,68 | 19,97 | -1,14 |  |
|      |        | -     | 10000,0 | 180,0 |        |        |       |       |  |
| 1750 | -71,54 | 13,05 | 0       | 0     | 268,44 | 252,96 | 7,99  | 1,94  |  |
|      |        | -     | 10000,0 | 163,0 |        |        |       |       |  |
| 1500 | -71,54 | 13,05 | 0       | 0     | 261,48 | 252,36 | 8,37  | 1,09  |  |
| 2884 | -77,50 | 0,62  | 400,00  | 22,00 | 325,15 | 252,21 | 23,13 | 3,15  |  |
| 2939 | -77,52 | 0,63  | 400,00  | 18,00 | 357,56 | 253,21 | 26,15 | 3,99  |  |
| 2884 | -77,50 | 0,62  | 400,00  | 15,00 | 287,64 | 252,29 | 28,67 | 1,23  |  |
| 2898 | -77,51 | 0,61  | 400,00  | 24,00 | 235,09 | 252,53 | 22,69 | -0,77 |  |
| 2887 | -77,50 | 0,61  | 400,00  | 13,00 | 221,30 | 251,99 | 31,11 | -0,99 |  |
| 2846 | -77,50 | 0,62  | 400,00  | 19,00 | 381,61 | 252,40 | 24,25 | 5,33  |  |
| 2979 | -77,55 | 0,62  | 400,00  | 22,00 | 323,55 | 253,05 | 23,81 | 2,96  |  |

|      |        |       |         |       |        |        |       |       |
|------|--------|-------|---------|-------|--------|--------|-------|-------|
| 2992 | -77,55 | 0,62  | 400,00  | 27,00 | 316,19 | 253,25 | 21,10 | 2,98  |
| 2962 | -77,52 | 0,63  | 400,00  | 20,00 | 291,37 | 253,30 | 25,32 | 1,50  |
| 2935 | -77,52 | 0,63  | 400,00  | 20,00 | 338,47 | 253,44 | 25,11 | 3,39  |
|      |        | -     | 10000,0 |       |        |        |       |       |
| 1000 | -65,33 | 26,76 | 0       | 32,00 | 237,81 | 252,22 | 18,65 | -0,77 |
|      |        | -     | 10000,0 |       |        |        |       |       |
| 1000 | -65,33 | 26,76 | 0       | 26,00 | 236,45 | 252,59 | 21,69 | -0,74 |
|      |        | -     | 10000,0 |       |        |        |       |       |
| 1000 | -65,33 | 26,76 | 0       | 26,00 | 240,29 | 252,85 | 21,38 | -0,59 |
|      |        | -     | 10000,0 |       |        |        |       |       |
| 1000 | -65,33 | 26,76 | 0       | 30,00 | 235,43 | 252,68 | 20,16 | -0,86 |
|      |        | -     | 10000,0 |       |        |        |       |       |
| 1000 | -65,33 | 26,76 | 0       | 25,00 | 237,06 | 252,36 | 22,03 | -0,69 |
|      |        | -     | 10000,0 |       |        |        |       |       |
| 1000 | -65,33 | 26,76 | 0       | 29,00 | 236,52 | 252,36 | 20,72 | -0,76 |
| 764  | -80,65 | -3,74 | 2500,00 | 47,00 | 241,64 | 252,43 | 16,15 | -0,67 |
|      |        | -     | 10000,0 |       |        |        |       |       |
| 521  | -64,46 | 23,22 | 0       | 44,00 | 232,82 | 252,28 | 16,98 | -1,15 |
|      |        | -     | 10000,0 |       |        |        |       |       |
| 586  | -75,67 | 5,78  | 0       | 70,00 | 232,29 | 251,70 | 12,71 | -1,53 |
|      |        | -     | 10000,0 |       |        |        |       |       |
| 524  | -64,45 | 22,93 | 0       | 42,00 | 234,41 | 252,66 | 16,58 | -1,10 |
|      |        | -     | 10000,0 |       |        |        |       |       |
| 1616 | -64,79 | 23,07 | 0       | 31,00 | 270,26 | 252,30 | 18,56 | 0,97  |
|      |        | -     | 10000,0 | 140,0 |        |        |       |       |
| 1000 | -71,57 | 12,96 | 0       | 0     | 254,90 | 252,84 | 9,19  | 0,22  |
| 3811 | -79,21 | -2,78 | 100,00  | 1,00  | NA     | NA     | NA    | NA    |
| 3841 | -79,21 | -2,77 | 100,00  | 1,00  | NA     | NA     | NA    | NA    |
| 3930 | -79,22 | -2,78 | 100,00  | 1,00  | NA     | NA     | NA    | NA    |
| 3890 | -79,23 | -2,78 | 100,00  | 1,00  | NA     | NA     | NA    | NA    |
| 3833 | -79,22 | -2,77 | 100,00  | 1,00  | NA     | NA     | NA    | NA    |
| 3735 | -79,22 | -2,77 | 100,00  | 1,00  | NA     | NA     | NA    | NA    |
|      |        | -     | 10000,0 |       |        |        |       |       |
| 3450 | -71,61 | 13,11 | 0       | 34,00 | 292,75 | 253,44 | 20,07 | 1,96  |
|      |        | -     | 10000,0 |       |        |        |       |       |
| 3250 | -71,61 | 13,11 | 0       | 46,00 | 321,81 | 252,96 | 16,16 | 4,26  |
|      |        | -     | 10000,0 |       |        |        |       |       |
| 3000 | -71,60 | 13,11 | 0       | 37,00 | 296,07 | 253,67 | 18,38 | 2,31  |
|      |        | -     | 10000,0 |       |        |        |       |       |
| 2750 | -71,59 | 13,11 | 0       | 54,00 | 342,74 | 253,04 | 15,02 | 5,97  |
|      |        | -     | 10000,0 |       |        |        |       |       |
| 2500 | -71,57 | 13,09 | 0       | 58,00 | 367,39 | 252,74 | 14,08 | 8,14  |

|      |        |       |         |         |        |        |       |       |
|------|--------|-------|---------|---------|--------|--------|-------|-------|
|      |        |       | -       | 10000,0 |        |        |       |       |
| 2250 | -71,57 | 13,08 | 0       | 82,00   | 365,38 | 253,13 | 12,04 | 9,33  |
|      |        |       | -       | 10000,0 |        |        |       |       |
| 2000 | -71,56 | 13,07 | 0       | 80,00   | 325,55 | 253,47 | 12,55 | 5,74  |
|      |        |       | -       | 10000,0 | 114,0  |        |       |       |
| 1800 | -71,56 | 13,07 | 0       | 0       | 302,27 | 252,82 | 10,14 | 4,88  |
| 498  | -77,68 | -1,06 | 3600,00 | 45,00   | 242,42 | 252,44 | 16,74 | -0,60 |
| 488  | -77,68 | -1,06 | 3600,00 | 25,00   | 231,44 | 253,44 | 22,97 | -0,96 |
| 458  | -77,68 | -1,05 | 3600,00 | 41,00   | 240,97 | 252,13 | 16,06 | -0,69 |
|      |        |       | 10000,0 | 184,0   |        |        |       |       |
| 2056 | -75,48 | 7,08  | 0       | 0       | 271,64 | 252,69 | 7,90  | 2,40  |
|      |        |       | -       | 10000,0 |        |        |       |       |
| 677  | -64,52 | 23,44 | 0       | 52,00   | 233,43 | 252,35 | 15,43 | -1,23 |
|      |        |       | -       | 10000,0 |        |        |       |       |
| 934  | -64,67 | 23,44 | 0       | 38,00   | 234,37 | 252,17 | 17,32 | -1,03 |
| 441  | -77,27 | -0,92 | 3600,00 | 34,00   | 245,12 | 252,19 | 18,57 | -0,38 |
| 414  | -77,28 | -0,92 | 3600,00 | 31,00   | 235,18 | 251,79 | 18,94 | -0,88 |
| 396  | -77,28 | -0,92 | 3600,00 | 37,00   | 243,68 | 251,75 | 17,79 | -0,45 |
| 1144 | -77,63 | -0,73 | 800,00  | 28,00   | 242,64 | 253,20 | 21,49 | -0,49 |
| 1249 | -77,61 | -0,70 | 800,00  | 43,00   | 239,32 | 251,42 | 16,26 | -0,74 |
| 1123 | -77,66 | -0,75 | 800,00  | 37,00   | 243,30 | 253,03 | 18,40 | -0,53 |
| 1057 | -77,65 | -0,75 | 800,00  | 45,00   | 266,39 | 253,09 | 16,16 | 0,82  |
| 1054 | -77,65 | -0,75 | 800,00  | 35,00   | 240,75 | 253,02 | 18,95 | -0,65 |
| 1071 | -77,65 | -0,75 | 800,00  | 34,00   | 247,45 | 252,43 | 17,85 | -0,28 |
| 1089 | -77,64 | -0,75 | 800,00  | 27,00   | 248,25 | 252,90 | 21,78 | -0,21 |
| 1135 | -77,63 | -0,73 | 800,00  | 18,00   | 214,25 | 253,54 | 26,72 | -1,47 |
| 1158 | -77,63 | -0,73 | 800,00  | 47,00   | 238,76 | 252,78 | 16,19 | -0,87 |
| 1149 | -77,64 | -0,73 | 800,00  | 47,00   | 242,45 | 252,55 | 15,95 | -0,63 |
| 1400 | -77,63 | -0,70 | 800,00  | 45,00   | 240,55 | 252,44 | 16,15 | -0,74 |
| 1314 | -77,63 | -0,69 | 800,00  | 29,00   | 237,88 | 252,71 | 21,06 | -0,70 |
| 1301 | -77,62 | -0,69 | 800,00  | 38,00   | 241,12 | 252,19 | 17,67 | -0,63 |
| 1127 | -77,64 | -0,74 | 800,00  | 45,00   | 245,29 | 252,12 | 16,27 | -0,42 |
| 1316 | -77,62 | -0,69 | 800,00  | 41,00   | 240,30 | 253,16 | 16,94 | -0,76 |
| 1130 | -77,61 | -0,73 | 800,00  | 36,00   | 237,66 | 253,32 | 18,48 | -0,85 |
| 1074 | -77,59 | -0,74 | 800,00  | 53,00   | 244,76 | 252,88 | 15,04 | -0,54 |
| 1166 | -77,61 | -0,73 | 800,00  | 49,00   | 243,00 | 253,26 | 15,91 | -0,64 |
| 1200 | -77,63 | -0,71 | 800,00  | 25,00   | 234,28 | 253,02 | 22,63 | -0,83 |
| 1232 | -77,63 | -0,70 | 800,00  | 30,00   | 239,65 | 253,53 | 20,95 | -0,66 |
|      |        |       | -       | 10000,0 |        |        |       |       |
| 3000 | -71,59 | 13,59 | 0       | 55,00   | 308,33 | 253,28 | 14,81 | 3,72  |
| 3790 | -78,59 | -0,13 | 100,00  | 6,00    | 242,36 | 252,35 | 46,63 | -0,21 |
| 3857 | -78,59 | -0,13 | 100,00  | 8,00    | 215,38 | 251,65 | 39,22 | -0,92 |
| 3891 | -78,58 | -0,13 | 100,00  | 8,00    | 224,61 | 253,43 | 42,69 | -0,68 |

|        |        |       |         |       |        |        |       |       |
|--------|--------|-------|---------|-------|--------|--------|-------|-------|
| 3894   | -78,58 | -0,13 | 100,00  | 9,00  | 208,68 | 253,38 | 37,73 | -1,18 |
| 3798   | -78,59 | -0,13 | 100,00  | 9,00  | 235,20 | 253,84 | 38,26 | -0,49 |
| 3835,8 | -78,59 | -0,13 | 100,00  | 8,00  | 227,15 | 252,99 | 40,93 | -0,63 |
| 3820,6 | -78,59 | -0,13 | 100,00  | 10,00 | 232,20 | 253,24 | 36,38 | -0,58 |
| 3820,4 | -78,59 | -0,13 | 100,00  | 8,00  | 227,33 | 252,94 | 40,05 | -0,64 |
| 3833,4 | -78,58 | -0,13 | 100,00  | 6,00  | 195,85 | 254,24 | 48,00 | -1,22 |
| 3843   | -78,58 | -0,13 | 100,00  | 5,00  | 218,01 | 252,14 | 49,19 | -0,69 |
|        |        | -     | 10000,0 |       |        |        |       |       |
| 500    | -64,91 | 23,94 | 0       | 31,00 | 229,70 | 252,89 | 20,02 | -1,16 |
|        |        | -     | 10000,0 |       |        |        |       |       |
| 1610   | -65,08 | 24,24 | 0       | 19,00 | 283,16 | 252,64 | 25,70 | 1,19  |
|        |        | -     | 10000,0 |       |        |        |       |       |
| 2059   | -65,06 | 24,23 | 0       | 16,00 | 285,00 | 252,04 | 27,68 | 1,19  |
| 1853   | -78,92 | -4,61 | 400,00  | 26,00 | 279,33 | 253,55 | 22,29 | 1,16  |
| 2107   | -78,91 | -4,61 | 400,00  | 39,00 | 266,39 | 252,61 | 17,66 | 0,78  |
| 1692   | -78,94 | -4,62 | 400,00  | 34,00 | 235,58 | 252,81 | 18,87 | -0,91 |
| 1659   | -78,96 | -4,62 | 400,00  | 34,00 | 268,97 | 253,17 | 18,25 | 0,87  |
| 1649   | -78,96 | -4,62 | 400,00  | 32,00 | 238,09 | 252,43 | 18,74 | -0,77 |
| 1697   | -78,95 | -4,62 | 400,00  | 23,00 | 234,02 | 251,61 | 20,84 | -0,84 |
| 1644   | -78,96 | -4,62 | 400,00  | 33,00 | 238,63 | 251,78 | 17,96 | -0,73 |
| 2060   | -78,90 | -4,61 | 400,00  | 16,00 | 308,48 | 253,92 | 28,07 | 1,94  |
| 2067   | -78,90 | -4,61 | 400,00  | 15,00 | 314,68 | 252,84 | 28,70 | 2,15  |
| 2016   | -78,90 | -4,61 | 400,00  | 14,00 | 365,34 | 252,84 | 29,00 | 3,88  |
| 2047   | -78,90 | -4,61 | 400,00  | 14,00 | 317,48 | 253,39 | 30,53 | 2,10  |
| 1835   | -78,92 | -4,62 | 400,00  | 21,00 | 288,06 | 252,71 | 23,42 | 1,51  |
| 2083   | -78,91 | -4,61 | 400,00  | 19,00 | 297,34 | 252,39 | 24,70 | 1,82  |
| 1829   | -78,92 | -4,62 | 400,00  | 26,00 | 281,26 | 253,71 | 21,81 | 1,26  |
| 1912   | -78,92 | -4,61 | 400,00  | 25,00 | 286,14 | 253,70 | 22,49 | 1,44  |
| 1918   | -78,92 | -4,61 | 400,00  | 31,00 | 269,98 | 253,12 | 20,23 | 0,83  |
| 2094   | -78,91 | -4,61 | 400,00  | 26,00 | 244,25 | 252,69 | 22,08 | -0,38 |
| 2035   | -78,91 | -4,61 | 400,00  | 26,00 | 280,83 | 251,43 | 20,04 | 1,47  |
| 2157   | -78,91 | -4,60 | 400,00  | 34,00 | 271,40 | 252,13 | 18,78 | 1,03  |
| 2108   | -78,91 | -4,61 | 400,00  | 21,00 | 289,42 | 253,78 | 25,06 | 1,42  |
|        |        |       | 10000,0 |       |        |        |       |       |
| 2419   | -79,12 | -4,49 | 0       | 83,00 | 259,50 | 253,69 | 12,77 | 0,46  |
|        |        |       | 10000,0 | 153,0 |        |        |       |       |
| 2109   | -79,06 | -4,41 | 0       | 0     | 275,29 | 252,52 | 8,70  | 2,62  |
|        |        |       | 10000,0 |       |        |        |       |       |
| 928    | -78,62 | -3,73 | 0       | 92,00 | 239,20 | 253,11 | 11,19 | -1,24 |
|        |        |       | 10000,0 | 100,0 |        |        |       |       |
| 1055   | -78,62 | -3,73 | 0       | 0     | 238,33 | 252,79 | 10,66 | -1,36 |

## References

47. M. Vellend, W. K. Cornwell, K. Magnuson-Ford, A. Ø. Mooers, Measuring phylogenetic biodiversity. *Front. Meas. Biol. Divers.* **2010**, 194–207.
48. D. Schluter, M. W. Pennell, Speciation gradients and the distribution of biodiversity. *Nature* **546**, 48–55 (2017).
49. D. L. Rabosky, P. O. Title, H. Huang, Minimal effects of latitude on present-day speciation rates in New World birds. *Proc. R. Soc. B Biol. Sci.* **282** (2015).
50. J. Igea, A. J. Tanentzap, Angiosperm speciation cools down in the tropics. *Ecol. Lett.* **23**, 692–700 (2020).
